# Supplementary material for: Early Treatments of Fragile Children with COVID-19—Results of CLEVER (Children COVID Early Treatment), a Retrospective, Observational Study
Source: MDPI journal article supplement (doi:10.3390/v15010192), 2023-01-10
Supplement: s1 [file s1]

## Supplementary Material

**Table 1 Supplementary.** Patients' basal features according to specific drugs.

|                                               | <b>Bamlanivimab-Etesevimab</b> | <b>Molnupinavir</b>   | <b>Nimatrelvir - Ritonavir</b> | <b>Remdesivir</b>               | <b>Sotrovimab</b>                 |
|-----------------------------------------------|--------------------------------|-----------------------|--------------------------------|---------------------------------|-----------------------------------|
| <b>Patient n. (%)</b>                         | 1/32 (3)                       | 2/32 (6.2)            | 3/32 (9.3)                     | 7/32 (21.8)                     | 19/32 (59.7)                      |
| <b>Gender</b>                                 |                                |                       |                                |                                 |                                   |
| <i>F</i> n. (%)                               | 1 (100)                        | 1 (50)                | 1 (33)                         | 2 (28.5)                        | 10 (52.6)                         |
| <i>M</i> n. (%)                               | 0                              | 1 (50)                | 2 (67)                         | 5 (71.5)                        | 9 (47.4)                          |
| <b>Age (years)<sup>1,2</sup></b>              | 6                              | 9.7-10.3 <sup>1</sup> | 15-18 <sup>1</sup>             | 2.5<br>(4.25,6.75) <sup>2</sup> | 8.44<br>(4.88,10.83) <sup>2</sup> |
| <b>Age, categorical (years)<sup>1,2</sup></b> |                                |                       |                                |                                 |                                   |
| <=2                                           | 0                              | 0                     | 0                              | 1                               | 3                                 |
| >2                                            | 1                              | 2                     | 3                              | 6                               | 16                                |
| <b>Weight (kg)</b>                            | 24.2                           | 42.5-45 <sup>1</sup>  | 59-65 <sup>1</sup>             | 15.5 (6.5,22) <sup>2</sup>      | 23.5 (6.5,30) <sup>2</sup>        |
| <b>Baseline disease n. (%)</b>                |                                |                       |                                |                                 |                                   |
| <i>Oncohematological</i>                      | 1 (100)                        | 2 (100)               | 2 (66.6)                       | 6 (85.7)                        | 11 (57.8)                         |
| <i>Solid Organ Transplantation</i>            | 0                              | 0                     | 0                              | 0                               | 4 (21.1)                          |
| <i>Other</i>                                  | 0                              | 0                     | 1 (33.4)                       | 1 (14.3)                        | 4 (21.1)                          |
| <b>COVID-19 vaccination n. (%)</b>            |                                |                       |                                |                                 |                                   |
| <i>No</i>                                     | 1 (100)                        | 2 (100)               | 3 (100)                        | 7 (100)                         | 19 (100)                          |
| <b>Steroid therapy</b>                        | 1(100)                         | 2 (100)               | 0                              | 2 (25.8)                        | 8 (42)                            |
| <b>Polytherapy</b>                            | 1(100)                         | 2 (100)               | 3 (100)                        | 2 (25.8)                        | 11 (57.8)                         |
| <b>COVID-19 symptoms n. (%)</b>               |                                |                       |                                |                                 |                                   |
| <i>Asymptomatic</i>                           | 1 (100)                        | 1 (50)                | 2 (66.6)                       | 3 (42.8)                        | 4 (21)                            |
| <i>Mild symptoms</i>                          | 0                              | 1 (50)                | 1 (33.4)                       | 4 (57.2)                        | 15 (79)                           |
| <b>Mechanical ventilation n. (%)</b>          | 0                              | 0                     | 0                              | 0                               | 0                                 |
| <b>Non-invasive ventilation n. (%)</b>        | 1 (100)                        | 0                     | 0                              | 0                               | 0                                 |
| <b>Oxygen requirement n. (%)</b>              | 1 (100)                        | 0                     | 0                              | 1 (14.2)                        | 1 (5.2)                           |
| <b>Off-label prescription n. (%)</b>          | 1 (100)                        | 2 (100)               | 2 (66.6)                       | 7 (100)                         | 15 (78.9)                         |
| <b>Serum creatinine (μmol/L)</b>              | 15                             | 23-118 <sup>1</sup>   | 35-60 <sup>1</sup>             | 18 (30,31) <sup>2</sup>         | 40.5 (29,56.7) <sup>2</sup>       |
| <b>AST (U/L)</b>                              | 69                             | 13-24 <sup>1</sup>    | 28-71 <sup>1</sup>             | 67 (47,89) <sup>2</sup>         | 42 (27.5,66) <sup>2</sup>         |
| <b>ALT (U/L)</b>                              | 39                             | 6-35 <sup>1</sup>     | 39-125 <sup>1</sup>            | 70 (33.5,87) <sup>2</sup>       | 44 (24,75.7) <sup>2</sup>         |
| <b>Symptoms after 7 days n. (%)</b>           |                                |                       |                                |                                 |                                   |
| <i>Asymptomatic</i>                           | 1 (100)                        | 2 (100)               | 1 (33.4)                       | 5 (71.4)                        | 17 (89.4)                         |
| <i>Still Symptoms</i>                         | 0                              | 0                     | 1 (33.4)                       | 1 (14.2)                        | 1 (5.2)                           |
| <b>Positivity after 7 days n. (%)</b>         |                                |                       |                                |                                 |                                   |

|                                         |         |         |          |          |           |
|-----------------------------------------|---------|---------|----------|----------|-----------|
| <i>Negative</i>                         | 0       | 0       | /        | /        | 1 (5.2)   |
| <i>Positive</i>                         | 1 (100) | 2 (100) | 2 (66.6) | 6 (85.7) | 15 (78.9) |
| <b>Symptoms after 28 days n. (%)</b>    |         |         |          |          |           |
| <i>Asymptomatic</i>                     | 0       | 2 (100) | 2 (66.6) | 6 (85.7) | 16 (84.2) |
| <i>Still symptoms</i>                   | 1 (100) | 0       | /        | /        | /         |
| <b>Positivity after 28 days n. (%)</b>  |         |         |          |          |           |
| <i>Negative</i>                         | 0       | 1 (50)  | 1 (33.4) | 4 (57.1) | 11 (57.8) |
| <i>Positive</i>                         | 1 (100) | 1 (50)  | 1 (33.4) | 2 (28.5) | 4 (21)    |
| <b>Severe ADR n. (%)</b>                |         |         |          |          |           |
| <i>No</i>                               | 1 (100) | 2 (100) | 3 (100)  | 7 (100)  | 19 (100)  |
| <b>Death for other causes n. (%)</b>    | 0       | 0       | 0        | 1 (14.2) | 2 (10.5)  |
| <b>Lost at follow-up at 7 days</b>      | 0       | 0       | 1 (33.)  | 0        | 0         |
| <b>Lost at follow-up at 28 days</b>     | 0       | 0       | 0        | 0        | 1 (5.2)   |
| 1 Range, 2 Median (Interquartile range) |         |         |          |          |           |
